# Supplementary material for: Visible light driven (VLD) reduced TiO 2− x nanocatalysts designed by inorganic and organic reducing agent-mediated solvothermal methods for electrocatalytic and photocatalytic applications
Source: Royal Society of Chemistry journal article supplement (doi:10.1039/d4ra03402c), 2024-01-01
Supplement: d4ra03402c1.pdf [file d4ra03402c1.pdf]

## **Supporting information**

### **Visible light driven (VLD) reduced TiO<sub>2-x</sub> nanocatalysts designed by inorganic and organic reducing agents mediated solvothermal methods for electrocatalytic and photocatalytic applications**

Sadaf Jamil<sup>a</sup>, Naila Jabeen<sup>b\*</sup>, Fatima Sajid<sup>a</sup>, Latif U. Khan<sup>c</sup>, Afia Kanwal<sup>a</sup>, Manzar Sohail<sup>d</sup>,  
Muhammad Zaheer<sup>e</sup>, Zareen Akhter<sup>a\*</sup>

#### **Authors Affiliation:**

<sup>a</sup> Department of chemistry, Quaid-i-Azam university Islamabad 45320, Pakistan

<sup>b</sup> Nanosciences and Technology Division, National Centre for Physics, QAU Campus, Shahdra  
Valley Road, P.O. Box 2141, Islamabad-44000, Pakistan

<sup>c</sup> Synchrotron-light for Experimental Science and Applications in the Middle East (SESAME)  
P.O. Box 7, Allan 19252, Jordan

<sup>d</sup> School of Natural Sciences, National University of Sciences and Technology (NUST), H-12,  
Islamabad, Pakistan

<sup>e</sup> Lahore University of Management Sciences DHA, Lahore cantt, 54792, Pakistan

#### **Corresponding Authors:**

**Dr Naila Jabeen**

[Naila.jabeen@ncp.edu.pk](mailto:Naila.jabeen@ncp.edu.pk)

[Naila.chem@gmail.com](mailto:Naila.chem@gmail.com)

**Prof. Dr Zareen Akhter**

[zareen\\_a@gau.edu.pk](mailto:zareen_a@gau.edu.pk)

### **S.i. XAFS spectra measurements and fitting**

The X-ray absorption fine structure (XAFS) spectra were measured on the XAFS/XRF beamline, Synchrotron-Light for Experimental Science and Applications in the Middle East (SESAME), operating at 2.5 GeV in “decay” mode with a maximum electron current of 250 mA. XAFS spectra were acquired in fluorescence mode with a Silicon Drift Detectors (SDD), KETEK GmbH at room temperature, in the spectral range of Zn K-edge (9659 eV) for the Z-C-TiO<sub>2</sub> and Z-R-TiO<sub>2-x</sub>. X-ray beam intensity before and after the sample was also measured by two ionization chambers filled with a mixture of noble gases. The energy was calibrated according to the absorption *K*-edge of Zn metallic foil. The samples were prepared in pellet form by pressing a homogeneous mixture of calculated quantity of finely ground material and polyvinylpyrrolidone (PVP) powder. The amount of material in each pellet was calculated using XAFS mass software to give an absorption  $\mu_r \sim 1.5$ , just above the Zn absorption *K*-edge.

The extended X-ray absorption fine structure (EXAFS) spectra were quantitatively analyzed and nonlinear best fit was performed for the Fourier transformed  $k^2$ -weighted experimental EXAFS signals, using Artemis program [1] from the Demeter. The EXAFS data were preprocessed in Athena. Fitting procedure employs both the imaginary and real parts of the Fourier transformed EXAFS oscillations and theoretical EXAFS paths that were constructed from the ZnSe zinc-blende structure of lattice parameters ( $a = 5.674$ ,  $b = 5.674$  and  $c = 5.674$  Å) using FEFF 8-lite code in Artemis program. The best fits to the Zn *K*-edge EXAFS data were performed in R-space in the interval of 1–4.0 Å with Hanning windows in the 3–12 Å<sup>-1</sup> $k$  range, and two single scattering (SS) paths were used, including Zn-Se (2.45 Å) and Zn-Zn (4.00 Å).

The fitting parameters included amplitude reduction factor ( $S_0^2$ ) and correction to the difference in photoelectron energy between the experimental data and FEFF calculation ( $\Delta E$ ), which were set similar for all the scattering paths. Whereas, interatomic distances ( $R$ ) and disorder in the bond lengths or mean-square relative displacements (MSRDs), also known as Debye-Waller factors ( $\sigma^2$ ) were refined to get the best fit result.

### ***S.ii. Electrochemical studies***

The electrochemical studies were conducted on an electrochemical workstation (CHI 660D) in a standard three-electrode system with the as-prepared electrocatalysts on fluorine-doped tin oxide (FTO) glasses as the working electrode, a Pt wire as the counter electrode and Ag/AgCl as the reference electrode. The electrolyte was an aqueous solution of 0.1 M NaOH (pH = 13). The working electrode was fabricated as follows: 300 mg of active material was sonicated with absolute ethanol and nafion to form slurry, following by coating the slurry on a piece of FTO glass.

The measured potentials vs. Ag/AgCl were converted to the reversible hydrogen electrode (RHE) scale according to the Nernst equation [2] given below:

$$E_{RHE} = E_{Ag/AgCl} + 0.059pH + E_{Ag/AgCl}^0 \quad (\text{S. i})$$

Where  $E_{RHE}$  is the converted potential vs. RHE,  $E_{Ag/AgCl}$  is the experimental potential measured against Ag/AgCl reference electrode, and  $E_{Ag/AgCl}^0$  is the standard potential of Ag/AgCl at 25 °C (0.1976 V). LSV (OER & HER) were performed at scan rate of 50 mV/ s. The CV was done at scan rate of 25 mV/ s, 50 mV/ s, 100 mV/ s, 200 mV / s, 400 mV / s and 800 mV / s. EIS measurements were done at a frequency of 0.1- 100000 Hz.

### S.iii. Photocatalytic activity evaluation

The application of synthesized photocatalysts was investigated by photodegradation of the reactive blue-866 (RB-866) dye under visible light irradiation in sunlight. Photocatalytic activity was tested by mixing 5 mg of the photocatalysts (C-TiO<sub>2</sub>, Z-C-TiO<sub>2</sub>, R-TiO<sub>2-x</sub> and Z-R-TiO<sub>2-x</sub>) (1 g/L) in 50 mL of reactive blue-866 dye solution (20 ppm prepared in double distilled water). After ultrasonication, the samples were bubbled with atmospheric oxygen for about 1 hour in order to create adsorption-desorption equilibrium. After dark adsorption period, the first sample was taken out considered as initial concentration. Five more samples were regularly withdrawn from the reactor after 10, 20, 30, 40 and 50 min of direct sunlight irradiation. These solutions were immediately centrifuged to separate any suspended solids and analyzed using a UV-Vis spectrophotometer to measure the percentage degradation at wavelength range of 350 nm - 750 nm. The following equation was used to find out the percent degradation activity of each photocatalyst [3].

$$\eta(\%) = \frac{A_0 - A_t}{A_0} \times 100 \quad (\text{S. ii})$$

Where  $A_0$  = initial concentration of dye,  $A_t$  = concentration of dye at time  $t$ .

### S.iv. Theoretical band edge calculation

Butler and Ginley introduced a theoretical approach [4] for the prediction of the position of band edges using the above relation where  $E_0$  is the energy of free electrons on the hydrogen scale ( $4.44 \pm 0.02$  eV),  $E_g$  is the band gap energy, and  $\chi$  is the Sanderson electro negativity of the semiconductor, expressed as the geometric mean of the electro negativities of

the constituent atoms, which are defined after Mulliken as the arithmetic mean of the atomic electron affinity and the first ionization energy (both in eV). Equations S. (iii,iv) are given below

$$E_{VB} = \chi - E_0 + 0.5E_g \quad (\text{S.iii})$$

$$E_{CB} = E_{VB} - E_g \quad (\text{S. iv})$$

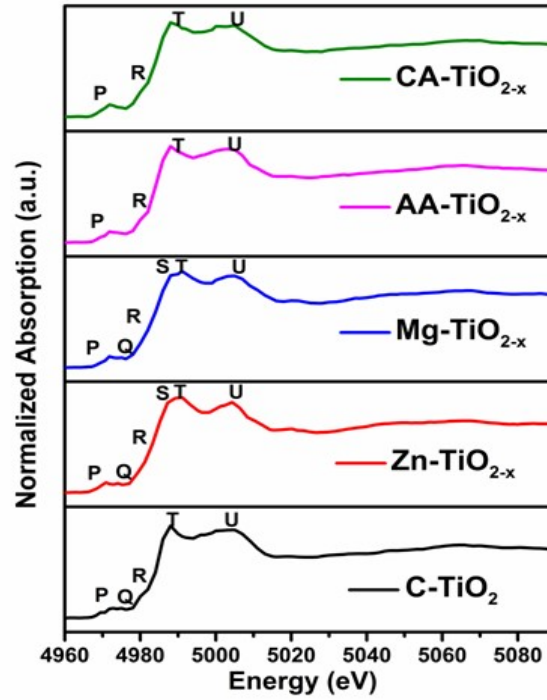

**Figure S.1 : Ti K-edge (4966 eV) X-ray absorption near edge structure (XANES) spectra of (C-TiO<sub>2</sub>), Mg-TiO<sub>2-x</sub>, CA-TiO<sub>2-x</sub>, AA-TiO<sub>2-x</sub> and Zn-TiO<sub>2-x</sub>**

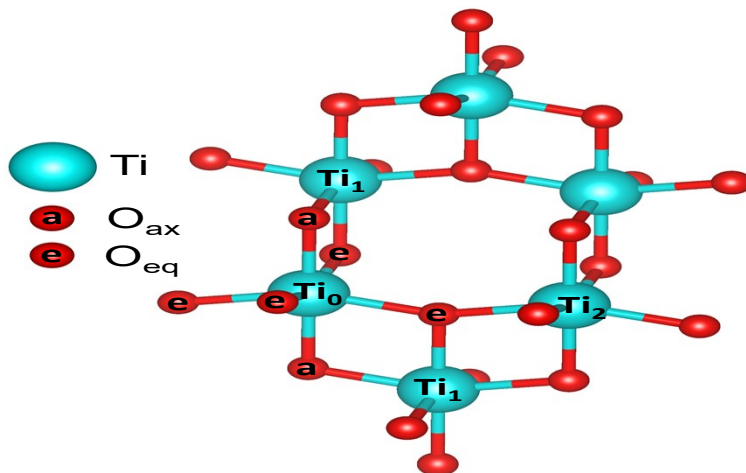

Figure S.2: 3D structure of anatase titania

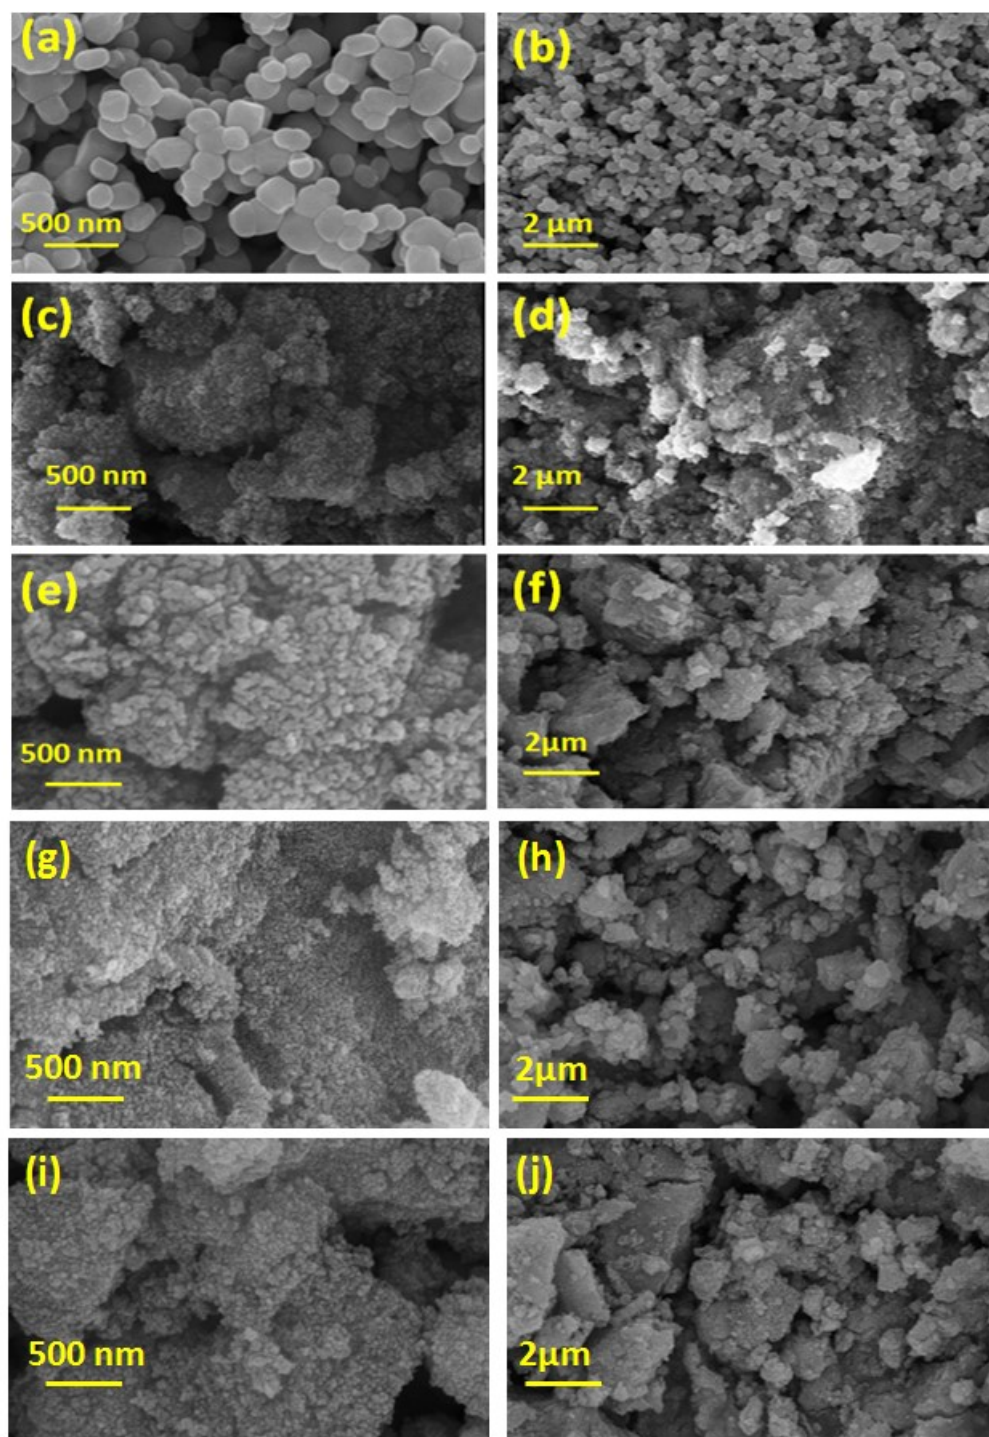

**Figure S.3:** SEM micrographs of (a,b) C-TiO<sub>2</sub>, (c,d) Zn-TiO<sub>2-x</sub>, (e,f) Mg-TiO<sub>2-x</sub>, (g,h) AA-TiO<sub>2-x</sub> and (i,j) CA-TiO<sub>2-x</sub> nanocatalysts.

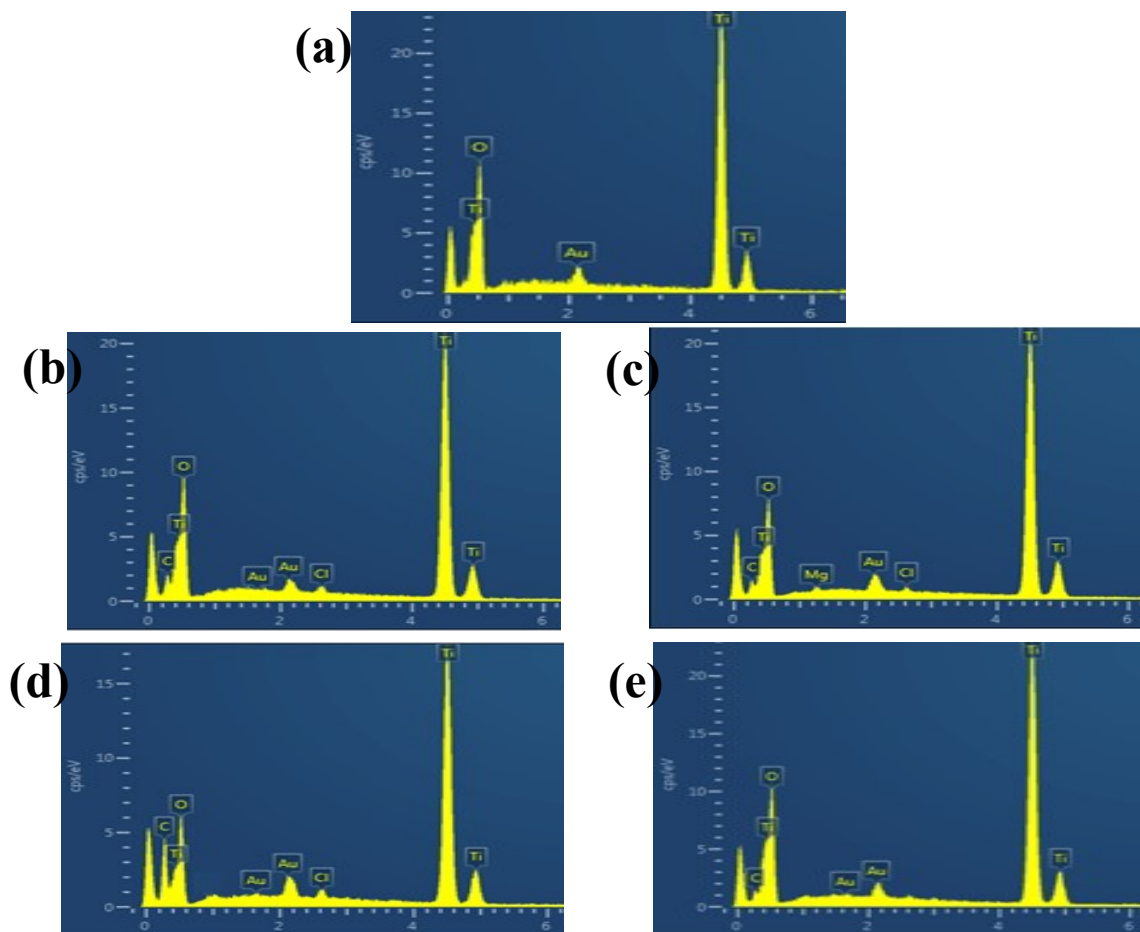

Figure S.4: EDS spectra of (a) C-TiO<sub>2</sub>, (b) Zn-TiO<sub>2-x</sub>, (c) Mg-TiO<sub>2-x</sub>, (d) AA-TiO<sub>2-x</sub> and (e) CA-TiO<sub>2-x</sub> nanocatalysts.

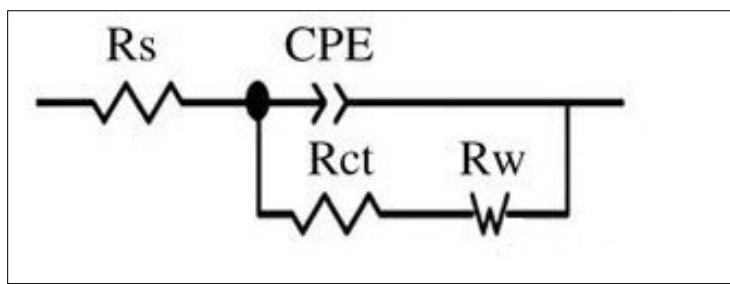

Figure S.5: Equivalent circuit for CPE model.



| <b>Material</b>             | <b>Bond Type</b>                     | <b>N</b>   | <b>R(Å)</b>         |
|-----------------------------|--------------------------------------|------------|---------------------|
| <b>C-TiO<sub>2</sub></b>    | <b>Ti<sub>0</sub>-O<sub>eq</sub></b> | <b>3.9</b> | <b>1.912±0.0101</b> |
|                             | <b>Ti<sub>0</sub>-O<sub>ax</sub></b> | <b>1.9</b> | <b>1.960±0.0101</b> |
|                             | <b>Ti<sub>0</sub>-Ti<sub>1</sub></b> | <b>4</b>   | <b>3.067±0.0148</b> |
|                             | <b>Ti<sub>0</sub>-Ti<sub>2</sub></b> | <b>3.9</b> | <b>3.749±0.0371</b> |
| <b>Zn-TiO<sub>2-x</sub></b> | <b>Ti<sub>0</sub>-O<sub>eq</sub></b> | <b>3.9</b> | <b>1.907±0.0196</b> |
|                             | <b>Ti<sub>0</sub>-O<sub>ax</sub></b> | <b>1.7</b> | <b>2.034±0.0449</b> |
|                             | <b>Ti<sub>0</sub>-Ti<sub>1</sub></b> | <b>3.3</b> | <b>3.060±0.0235</b> |
|                             | <b>Ti<sub>0</sub>-Ti<sub>2</sub></b> | <b>2.8</b> | <b>3.652±0.1488</b> |
| <b>Mg-TiO<sub>2-x</sub></b> | <b>Ti<sub>0</sub>-O<sub>eq</sub></b> | <b>3.7</b> | <b>1.911±0.0287</b> |
|                             | <b>Ti<sub>0</sub>-O<sub>ax</sub></b> | <b>1.9</b> | <b>1.992±0.0499</b> |
|                             | <b>Ti<sub>0</sub>-Ti<sub>1</sub></b> | <b>3.5</b> | <b>3.068±0.0189</b> |
|                             | <b>Ti<sub>0</sub>-Ti<sub>2</sub></b> | <b>2.7</b> | <b>3.663±0.240</b>  |
| <b>AA-TiO<sub>2-x</sub></b> | <b>Ti<sub>0</sub>-O<sub>eq</sub></b> | <b>3.9</b> | <b>1.913±0.0112</b> |
|                             | <b>Ti<sub>0</sub>-O<sub>ax</sub></b> | <b>1.7</b> | <b>1.961±0.0112</b> |
|                             | <b>Ti<sub>0</sub>-Ti<sub>1</sub></b> | <b>4</b>   | <b>3.068±0.0190</b> |
|                             | <b>Ti<sub>0</sub>-Ti<sub>2</sub></b> | <b>3.7</b> | <b>3.727±0.0551</b> |
| <b>CA-TiO<sub>2-x</sub></b> | <b>Ti<sub>0</sub>-O<sub>eq</sub></b> | <b>3.5</b> | <b>1.921±0.0101</b> |
|                             | <b>Ti<sub>0</sub>-O<sub>ax</sub></b> | <b>1.3</b> | <b>1.969±0.0101</b> |
|                             | <b>Ti<sub>0</sub>-Ti<sub>1</sub></b> | <b>4</b>   | <b>3.084±0.0173</b> |
|                             | <b>Ti<sub>0</sub>-Ti<sub>2</sub></b> | <b>3.9</b> | <b>3.733±0.0526</b> |

**Table S.1. Derived EXAFS fitting parameters, including N: coordination number, R: mean coordination shell radii,  $\sigma^2$ : mean square relative displacements (MSRDs) or Debye–Waller factor,  $S_0^2$ : amplitude reduction factor and  $E_0$ : photoelectron energy for the TiO<sub>2</sub> nanomaterials.**

| Catalysts                   | Surface area<br>m <sup>2</sup> /g | Pore volume<br>cc/g | Pore width (nm) | Particle size<br>(nm) |
|-----------------------------|-----------------------------------|---------------------|-----------------|-----------------------|
| <b>C-TiO<sub>2</sub></b>    | 14.243                            | 0.020               | 3.537           | 54                    |
| <b>Zn-TiO<sub>2-x</sub></b> | 247.925                           | 0.335               | 5.682           | 12                    |
| <b>Mg-TiO<sub>2-x</sub></b> | 342.598                           | 0.466               | 5.682           | 10                    |
| <b>AA-TiO<sub>2-x</sub></b> | 145.654                           | 0.228               | 5.682           | 24                    |
| <b>CA-TiO<sub>2-x</sub></b> | 228.254                           | 0.332               | 4.887           | 10                    |

**Table S. II. The textural properties of all nanocatalysts.**

| Samples                       | Band gap (eV) | Valence band edge (eV) | Conduction band edge (eV) |
|-------------------------------|---------------|------------------------|---------------------------|
| <b>C-TiO<sub>2</sub></b>      | 3.01          | 2.91                   | -0.29                     |
| <b>Zn-R-TiO<sub>2-x</sub></b> | 2.81          | 2.71                   | -0.04                     |
| <b>Mg-R-TiO<sub>2-x</sub></b> | 2.66          | 2.66                   | -0.04                     |
| <b>AA-R-TiO<sub>2-x</sub></b> | <1.5          | -                      | -                         |

|                         |      |      |       |
|-------------------------|------|------|-------|
| CA-R-TiO <sub>2-x</sub> | 2.71 | 2.66 | -0.04 |
|-------------------------|------|------|-------|

**Table S.III. Absorption and TRPL data of the synthesized photocatalysts.**

| Catalysts                 | (HER)<br>$\eta$<br>@ 10<br>mA cm <sup>-2</sup> | (OER)<br>$\eta$<br>@ 10<br>mA cm <sup>-2</sup> | Tafel<br>slope<br>(OER)<br>(mV dec <sup>-1</sup> ) | R <sub>ct</sub><br>( $\Omega$ ) | R <sub>s</sub><br>( $\Omega$ ) | CPE or Y <sup>0</sup><br>( $\mu$ f) | A<br>Surface<br>roughness | Wd or R <sub>w</sub><br>( $\mu\Omega$ ) |
|---------------------------|------------------------------------------------|------------------------------------------------|----------------------------------------------------|---------------------------------|--------------------------------|-------------------------------------|---------------------------|-----------------------------------------|
| C-TiO <sub>2</sub>        | >1000                                          | >1000                                          | 181                                                | 210.4                           | 22.59                          | 2.663e <sup>-6</sup>                | 919.8e <sup>-3</sup>      | 237.8e <sup>-6</sup>                    |
| Zn-<br>TiO <sub>2-x</sub> | 750                                            | 480                                            | 70                                                 | 10.58                           | 28.20                          | 7.450e <sup>-6</sup>                | 1.000                     | 3.807e <sup>-3</sup>                    |
| Mg-<br>TiO <sub>2-x</sub> | 650                                            | 420                                            | 62                                                 | 6.662                           | 18.10                          | 559.6e <sup>-6</sup>                | 820.00                    | 25.97e <sup>-3</sup>                    |
| AA-<br>TiO <sub>2-x</sub> | 780                                            | 485                                            | 79                                                 | 21.75                           | 32.07                          | 55.21e <sup>-6</sup>                | 8445e <sup>-3</sup>       | 4.311e <sup>-3</sup>                    |
| CA-<br>TiO <sub>2-x</sub> | 790                                            | 493                                            | 80                                                 | 12.26                           | 28.10                          | 999.0e <sup>-6</sup>                | 870.0e <sup>-3</sup>      | 25.97e <sup>-3</sup>                    |

<sup>a</sup>The electrolyte is 0.1 M NaOH solution.

**Table S. IV. Overpotential (HER & OER), Tafel slope and electrochemical impedance data of as prepared electrocatalysts<sup>a</sup>.**

| Electrocatalysts                                                                                                     | Current density<br>(j mA cm <sup>-2</sup> ) | Overpotential<br>( $\eta$ /mv)                   |
|----------------------------------------------------------------------------------------------------------------------|---------------------------------------------|--------------------------------------------------|
| TiO <sub>2</sub><br>Zn-TiO <sub>2-x</sub><br>Mg-TiO <sub>2-x</sub><br>AA-TiO <sub>2-x</sub><br>CA-TiO <sub>2-x</sub> | 10                                          | >1000 [Present Work]<br>750<br>650<br>780<br>790 |
| TiO <sub>2-x</sub><br>TiO <sub>1.51</sub><br>TiO <sub>0.89</sub><br>TiO <sub>1.23</sub>                              | 10                                          | 730 [5]<br>590<br>340<br>280                     |
| Tour-MWCNTs@Pd/TiO <sub>2</sub><br>Ox-MWCNTs@ Pd/TiO <sub>2</sub>                                                    | 1                                           | 350 [6]<br>310                                   |
| TiO <sub>2</sub><br>(Defect rich titania with 1-7min cathodization)                                                  | 1                                           | 800 [7]<br>390<br>370                            |

**TABLE S. V : Comparison of overpotential (HER) of present work with few similar works.**

## REFERENCES

- [1] B. Ravel, M. Newville, ATHENA, ARTEMIS, HEPHAESTUS: data analysis for X-ray absorption spectroscopy using IFEFFIT, *Journal of Synchrotron Radiation*. 12 (2005) 537–541.
- [2] S. Gul, J.K. Cooper, P.-A. Glans, J. Guo, V.K. Yachandra, J. Yano, J.Z. Zhang, Effect of Al<sup>3+</sup> co-doping on the dopant local structure, optical properties, and exciton dynamics in Cu<sup>+</sup>-doped ZnSe nanocrystals, *ACS Nano*. 7 (2013) 8680–8692.
- [3] A. Bashir, F. Bashir, Z. Mehmood, M.S. Satti, Z. Akhter, Synthesis, characterisation and investigation of enhanced photocatalytic activity of Sm<sup>3+</sup>, Ni<sup>2+</sup> co-doped TiO<sub>2</sub> nanoparticles on the degradation of azo dyes in visible region, *International Journal of Nanoparticles*. 11 (2019) 37–61.
- [4] W. Chen, G.-R. Duan, T.-Y. Liu, S.-M. Chen, X.-H. Liu, Fabrication of Bi<sub>2</sub>MoO<sub>6</sub> nanoplates hybridized with g-C<sub>3</sub>N<sub>4</sub> nanosheets as highly efficient visible light responsive heterojunction photocatalysts for Rhodamine B degradation, *Materials Science in Semiconductor Processing*. 35 (2015) 45–54.
- [5] Valenti, G., Boni, A., Melchionna, M., Cargnello, M., Nasi, L., Bertoni, G., Gorte, R.J., Marcaccio, M., Rapino, S., Bonchio, M. and Fornasiero, P., 2016. Co-axial heterostructures integrating palladium/titanium dioxide with carbon nanotubes for efficient electrocatalytic hydrogen evolution. *Nature communications*, 7(1), p.13549.

- [6] Swaminathan, J. and Ravichandran, S., 2018. Insights into the electrocatalytic behavior of defect-centered reduced titania (TiO<sub>1.23</sub>). *The Journal of Physical Chemistry C*, 122(3), pp.1670-1680.
- [7] Kumar, M.P., Murugadoss, G., Mangalaraja, R.V., Arunachalam, P., Kumar, M.R., Hartley, U.W., Salla, S., Rajabathar, J., ALothman, Z.A. and ALTalhi, T., 2021. Design and development of defect rich titania nanostructure for efficient electrocatalyst for hydrogen evolution reaction in an acidic electrolyte. *journal of materials research and technology*, 14, pp.2739-2750.
